# Supplementary material for: Fe7Se8 encapsulated in N-doped carbon nanofibers as a stable anode material for sodium ion batteries
Source: Royal Society of Chemistry journal article supplement (doi:10.1039/d0na00897d), 2020-11-10
Supplement: d0na00897d1.pdf [file d0na00897d1.pdf]

**Fe<sub>7</sub>Se<sub>8</sub> Encapsulated in N-doped Carbon Nanofibers as Stable Anode Materials  
for Sodium Ion Batteries**

Le Hu<sup>1#</sup>, Chaoqun Shang<sup>1#\*</sup>, Xin Wang<sup>1,2,3\*</sup>, Guofu Zhou<sup>1,2,3</sup>

<sup>1</sup> Guangdong Provincial Key Laboratory of Optical Information Materials and Technology & Institute of Electronic Paper Displays, South China Academy of Advanced Optoelectronics, South China Normal University, Guangzhou 510006, China

<sup>2</sup> National Center for International Research on Green Optoelectronics, South China Academy of Advanced Optoelectronics, South China Normal University, Guangzhou 510006, China

<sup>3</sup> International Academy of Optoelectronics at Zhaoqing, South China Normal University, Zhaoqing 526000, China

#These authors contributed equally.

\*Corresponding author:

chaoqun.shang@ecs-scnu.org

wangxin@scnu.edu.cn

### *Material Characterization*

The morphology of all the samples was observed by a field emission scanning electron microscope (FESEM, Zeiss Ultra 55) and a transmission electron microscope (TEM, JEOL JEM-2100F). Thermal gravimetric analysis (TGA, SDT Q600 TG-DTA) was carried out to confirm the content of Fe<sub>7</sub>Se<sub>8</sub>. The crystal phase was investigated by x-ray diffraction (XRD, Bruker D8 advance). The surface chemical compositions were measured on an x-ray photoelectron spectrometer (XPS, Kratos AXIS Ultra DLD).

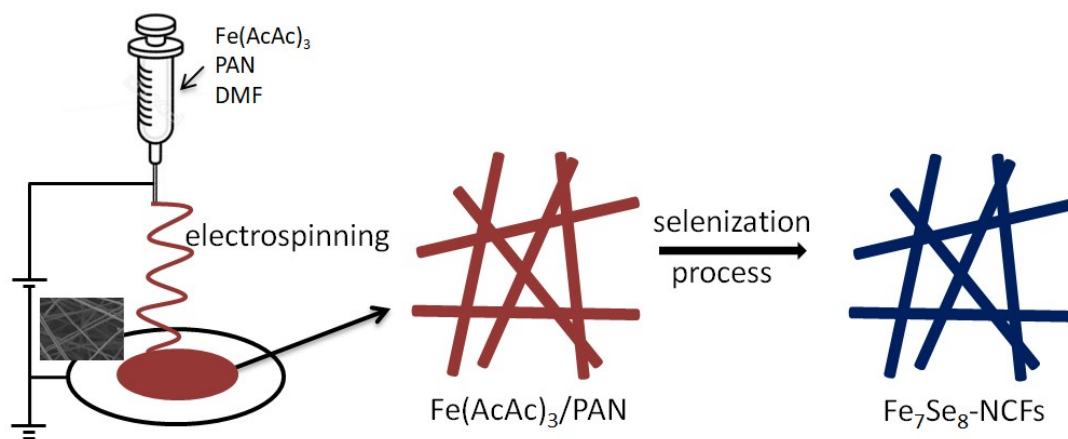

Figure S1. The schematic synthesis process of  $\text{Fe}_7\text{Se}_8$ -NCFs nanofibers.

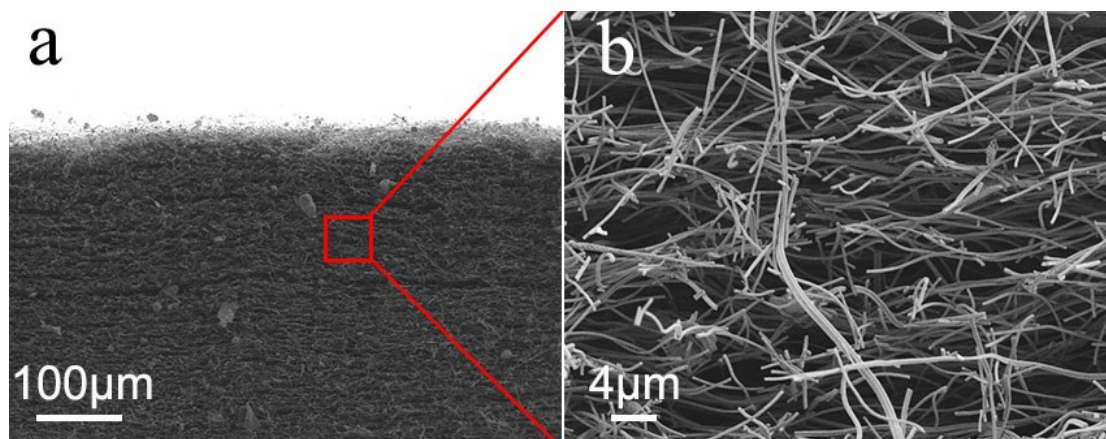

Figure S2. Cross-section SEM images of  $\text{Fe}_7\text{Se}_8$ -NCFs nanofibers.

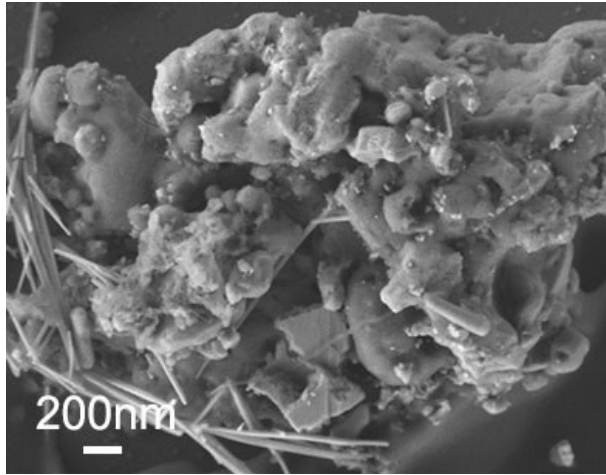

Figure S3. SEM image of bulk Fe<sub>7</sub>Se<sub>8</sub>.

The crystal size is calculated by the Scherrer's equation as follows:

$$D = \frac{K\lambda}{\beta \cos\theta}$$

Here, D is the average crystal diameter, K is a constant related the shape of the crystallites,  $\lambda$  is the wavelength of the X-rays employed,  $\beta$  is the corrected peak width (full width at half-maximum) and  $\theta$  is the diffraction angle.

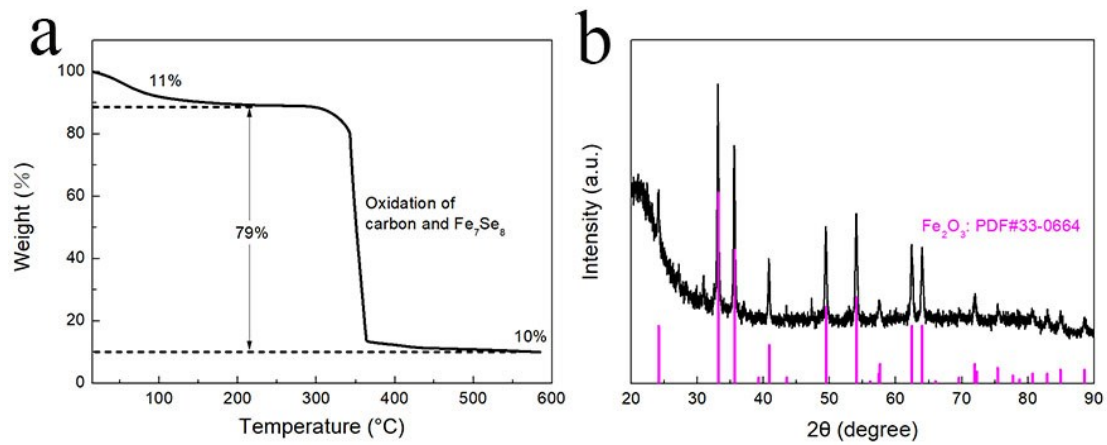

Figure S4. (a) the TGA spectra of Fe<sub>7</sub>Se<sub>8</sub>-NCFs; (b) the combustion product of Fe<sub>7</sub>Se<sub>8</sub>-NCFs.

The calculation of Fe<sub>7</sub>Se<sub>8</sub> content in Fe<sub>7</sub>Se<sub>8</sub>-NCFs:

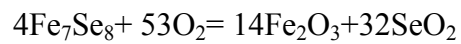

$$\text{Fe}_7\text{Se}_8 (\text{wt}\%) = \frac{4 \times \text{molecular weight of Fe}_7\text{Se}_8}{14 \times \text{molecular weight of Fe}_2\text{O}_3} \times \frac{\text{weight of Fe}_2\text{O}_3}{\text{weight of Fe}_7\text{Se}_8 - \text{NC}} \times 100\%$$

$$= \frac{4 \times 1022.6}{14 \times 159.7} \times \frac{1 - 0.79 - 0.11}{1 - 0.11} \times 100\%$$

$$= 20.6\%$$

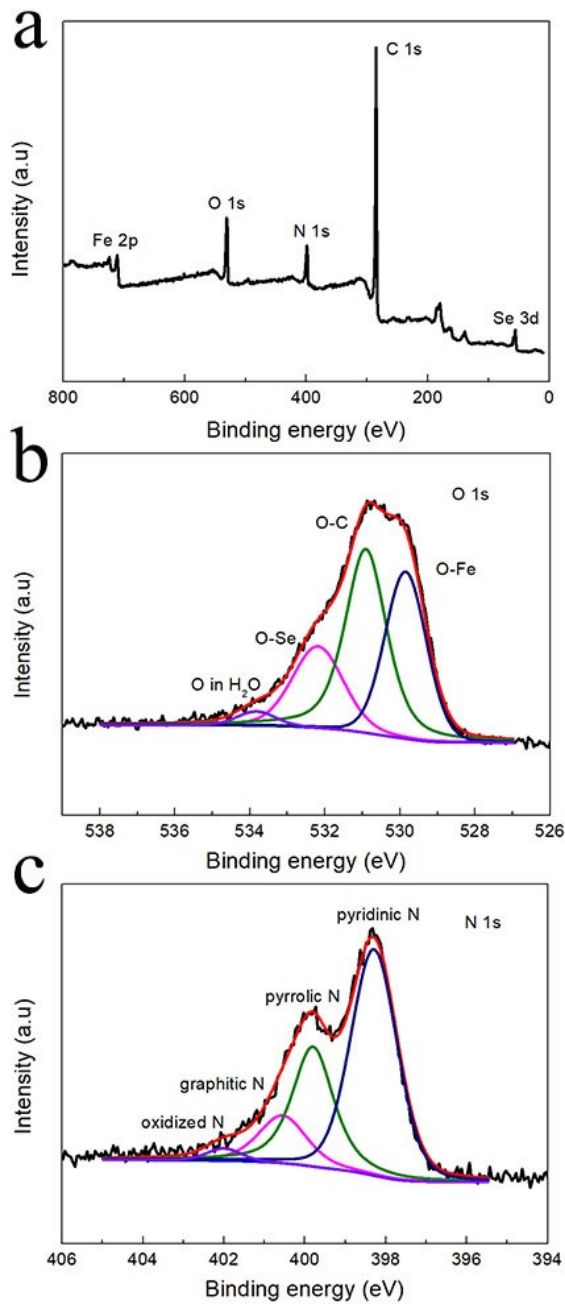

Figure S5. XPS survey spectra and corresponding (b) O 1s and (c) N 1s and (d) C 1s of the Fe<sub>7</sub>Se<sub>8</sub>-NCFs, respectively.

The O 1s spectrum is convoluted into four peaks at 533.8, 532.2, 530.9 and 529.8 eV, which are attributed to adsorbed water on the surface of sample, Se-O, C-O and Fe-O bonds (Figure S5b)[1]. The N 1s spectrum is deconvoluted into representative peaks centered at 402, 400.5, 399.8 and 398.3 eV, attributing to oxidized-N, graphitic-N, pyrrolic-N and pyridinic-N (Figure S5c)[2]

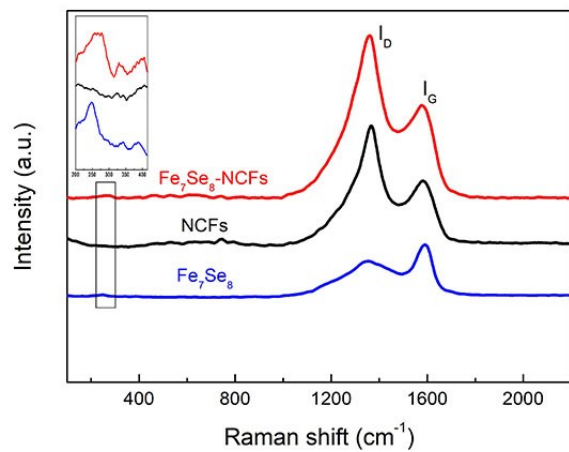

Figure S6. Raman spectra of Fe<sub>7</sub>Se<sub>8</sub>-NCFs, Fe<sub>7</sub>Se<sub>8</sub> and NCFs, respectively.

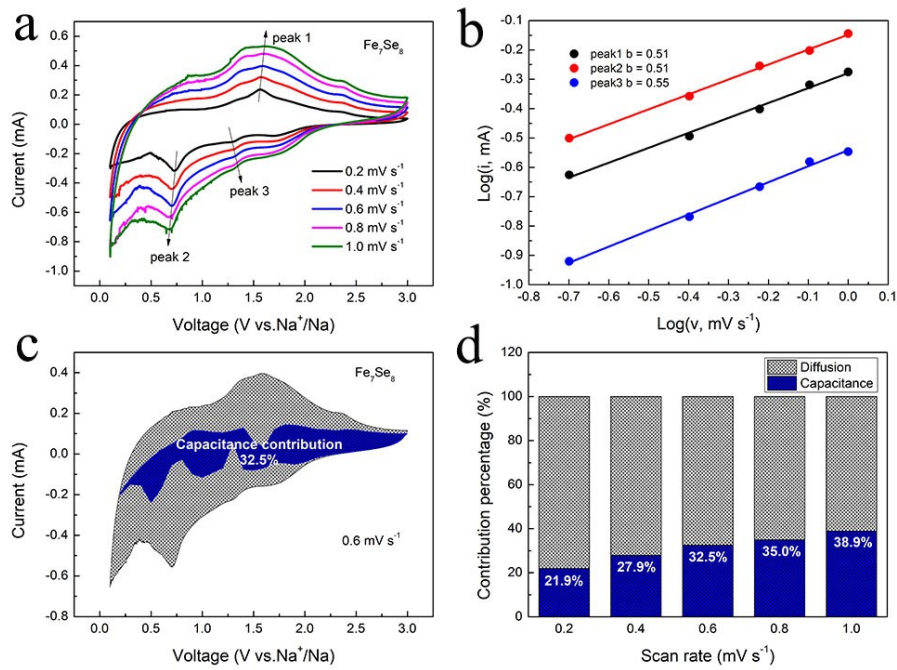

Figure S7. Kinetic analysis for sodium storage: (a) CV curves of  $\text{Fe}_7\text{Se}_8$  at different scan rates; (b) fitting line of  $\log(i)$  versus  $\log(v)$  plots of MnSe; (c) capacitive and diffusion-controlled contribution of  $\text{Fe}_7\text{Se}_8$  at  $0.6 \text{ mV s}^{-1}$ ; (d) ratio of contribution capacitive of  $\text{Fe}_7\text{Se}_8$  at different scan rates.



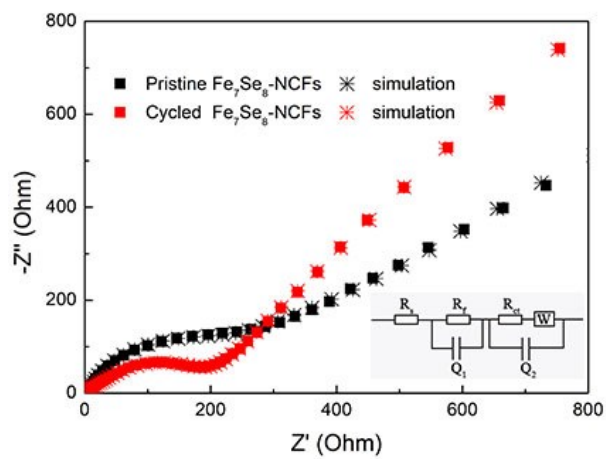

Figure S8. EIS curves at pristine and cycled state of Fe<sub>7</sub>Se<sub>8</sub>-NCFs.

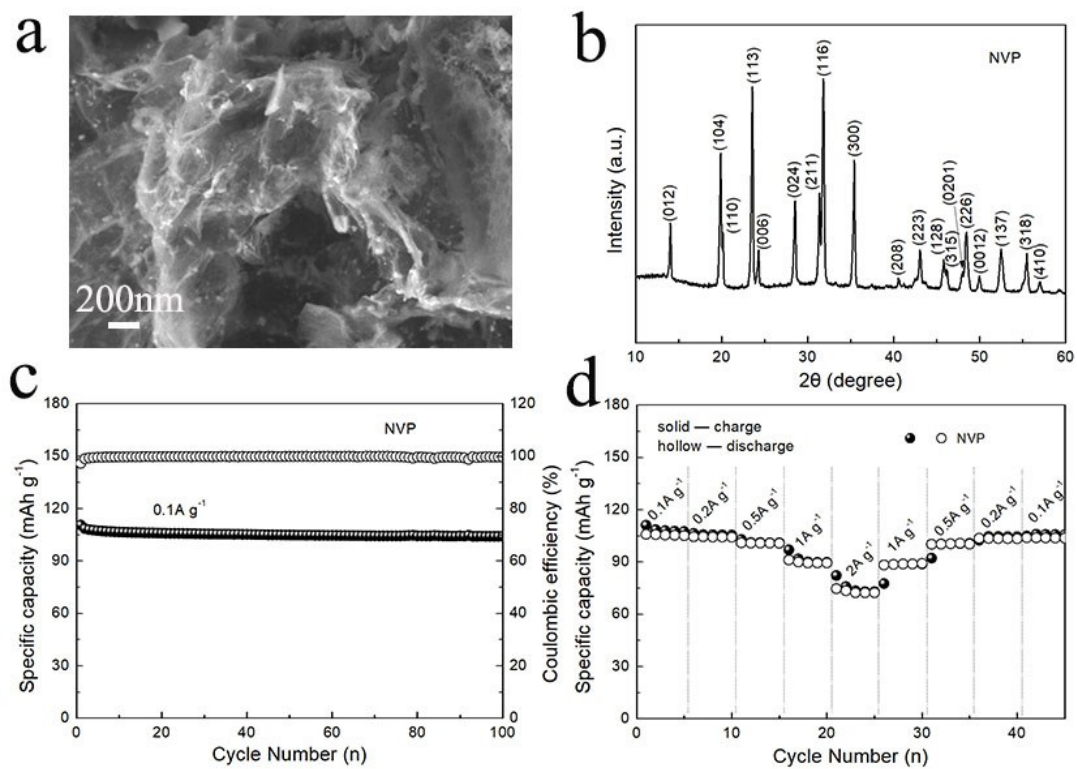

Figure S9. (a) SEM image and (b) XRD pattern of the NVP. (c) Cycling performance and (d) rate capability of the NVP cathode between 2.5 and 4.0 V in half cell.

Table S1. The comparison of electrochemical performance for Fe<sub>7</sub>Se<sub>8</sub>-NCFs and other Fe<sub>7</sub>Se<sub>8</sub>-based electrodes in sodium storage.

| Samples                                               | Sodium ion batteries                                               |                                                |
|-------------------------------------------------------|--------------------------------------------------------------------|------------------------------------------------|
|                                                       | Cycling performance<br>(reversible capacity)                       | Rate performance                               |
| Fe <sub>7</sub> Se <sub>8</sub> -NCFs<br>(This work)  | 148 mAh g <sup>-1</sup> at 2 A g <sup>-1</sup><br>(2000 cycles)    | 153 mAh g <sup>-1</sup> at 2 A g <sup>-1</sup> |
| Fe <sub>7</sub> Se <sub>8</sub> /N-CNF<br>(Ref. 12)   | 405.6 mAh g <sup>-1</sup> at 0.1 A g <sup>-1</sup><br>(500 cycles) | 364 mAh g <sup>-1</sup> at 2 A g <sup>-1</sup> |
| Fe <sub>7</sub> Se <sub>8</sub> @C/N NBs<br>(Ref. 14) | 385 mAh g <sup>-1</sup> at 0.1 A g <sup>-1</sup><br>(350 cycles)   | 320 mAh g <sup>-1</sup> at 2 A g <sup>-1</sup> |
| Fe <sub>7</sub> Se <sub>8</sub> @C<br>(Ref. 21)       | 399 mAh g <sup>-1</sup> at 0.5 A g <sup>-1</sup><br>(150 cycles)   | 353 mAh g <sup>-1</sup> at 2 A g <sup>-1</sup> |
| Fe <sub>7</sub> Se <sub>8</sub> @NC<br>(Ref. 25)      | 367 mAh g <sup>-1</sup> at 0.5 A g <sup>-1</sup><br>(400 cycles)   | 251 mAh g <sup>-1</sup> at 2 A g <sup>-1</sup> |
| Fe <sub>7</sub> Se <sub>8</sub> NRBs<br>(Ref. 29)     | 300 mAh g <sup>-1</sup> at 0.5 A g <sup>-1</sup><br>(500 cycles)   | 245 mAh g <sup>-1</sup> at 2 A g <sup>-1</sup> |

**Reference:**

- [1] C. Yuan, J. Li, L. Hou, X. Zhang, L. Shen, X.W.D. Lou, Ultrathin Mesoporous NiCo<sub>2</sub>O<sub>4</sub> Nanosheets Supported on Ni Foam as Advanced Electrodes for Supercapacitors, *Adv. Funct. Mater.*, 22 (2012) 4592-4597.
- [2] Q. Zhao, R. Bi, J. Cui, X. Yang, L. Zhang, TiO<sub>2-x</sub> Nanocages Anchored in N-Doped Carbon Fiber Films as a Flexible Anode for High-Energy Sodium-Ion Batteries, *ACS Appl. Energy Mater.*, 1 (2018) 4459-4466.
